# Supplementary material
Source: publisher figshare collection journal article supplement (https://springernature.figshare.com/ndownloader/files/20089064)
Supplement: Supplementary file 1 [file 20089064]

## Sheet: Tabelle1
	Complete Dataset (n = 332)			Minor Workers (n = 231)			Gynes (n= 56)
	PC 1	PC 2	PC 3	PC 1	PC 2	PC 3	PC 1	PC 2	PC 3
HW	0.39517	0.11264	-0.39648	0.38981	-0.12336	-0.43528	0.36452	-0.21985	0.02852
HL	0.40001	-0.10654	-0.34796	0.39189	-0.06832	-0.3182	0.38098	-0.10899	0.00722
SL	0.35379	0.56601	-0.06513	0.3681	0.49876	0.44596	0.36574	-0.28462	0.11619
SW	0.38726	-0.24405	-0.36146	0.36729	-0.37614	0.65179	0.35465	-0.17405	0.72875
EL	0.37665	-0.42788	0.21019	0.36652	-0.49972	-0.16157	0.37045	0.10445	-0.48001
FeL	0.35415	0.53272	0.46957	0.36785	0.5832	-0.22807	0.3772	-0.11409	-0.3373
WL	0.37602	-0.35939	0.56758	0.39296	-0.00496	0.08636	0.36477	0.2779	-0.19117
OcW	n.a.	n.a.	n.a.	n.a.	n.a.	n.a.	0.22332	0.85283	0.27174
